# Supplementary material
Source: publisher site journal article supplement (https://www.degruyterbrill.com/publication/isbn/9783110289954/downloadAsset/9783110289954_Inhaltsverzeichnis.pdf)
Supplement: Supplementary file 1 [file 9783110289954_Inhaltsverzeichnis.pdf]

## Inhaltsverzeichnis

### ZUR EINLEITUNG

|                                                                                               |   |
|-----------------------------------------------------------------------------------------------|---|
| Synopse der einzelnen Beiträge. Aspekte der Faktizitätsherstellung in diesem Sammelband ..... | 3 |
|-----------------------------------------------------------------------------------------------|---|

### DISKURSANALYTISCHE ANSÄTZE IN DER LINGUISTIK

|                                                                                                                                                                |    |
|----------------------------------------------------------------------------------------------------------------------------------------------------------------|----|
| <i>Ekkehard Felder</i><br>Faktizitätsherstellung mittels handlungsleitender Konzepte und agonaler Zentren. Der diskursive Wettkampf um Geltungsansprüche ..... | 13 |
|----------------------------------------------------------------------------------------------------------------------------------------------------------------|----|

|                                                                                              |    |
|----------------------------------------------------------------------------------------------|----|
| <i>Andreas Gardt</i><br>Textanalyse als Basis der Diskursanalyse. Theorie und Methoden ..... | 29 |
|----------------------------------------------------------------------------------------------|----|

|                                                                                                                           |    |
|---------------------------------------------------------------------------------------------------------------------------|----|
| <i>Martin Wengeler</i><br>Aspekte eines gemeinsamen Diskursbegriffs für das Forschungsnetzwerk „Sprache und Wissen“ ..... | 57 |
|---------------------------------------------------------------------------------------------------------------------------|----|

|                                                                                                                                                     |    |
|-----------------------------------------------------------------------------------------------------------------------------------------------------|----|
| <i>Ingo H. Warnke</i><br>Diskurslinguistik und die ‚wirklich gesagten Dinge‘ – Konzepte, Bezüge und Empirie der transtextuellen Sprachanalyse ..... | 75 |
|-----------------------------------------------------------------------------------------------------------------------------------------------------|----|

|                                                                                         |    |
|-----------------------------------------------------------------------------------------|----|
| <i>Marcus Müller</i><br>Wissenskonstituierung in Mündlichkeit und Schriftlichkeit ..... | 99 |
|-----------------------------------------------------------------------------------------|----|

### DISKURSLINGUISTISCHE EINZELFALLSTUDIEN DER FAKTIZITÄTHERSTELLUNG

|                                                                                                                                                                               |     |
|-------------------------------------------------------------------------------------------------------------------------------------------------------------------------------|-----|
| <i>Stephan Habscheid, Nadine Reuther</i><br>Performatisierung und Verräumlichung von Diskursen. Zur soziomateriellen Herstellung von ‚Sicherheit‘ an öffentlichen Orten ..... | 127 |
|-------------------------------------------------------------------------------------------------------------------------------------------------------------------------------|-----|

|                                                                                                                           |     |
|---------------------------------------------------------------------------------------------------------------------------|-----|
| <i>Alexander Ziem</i><br>Kognitive Abstraktionsstufen deklarativen Wissens. Evidenz aus korpusbasierten Fallstudien ..... | 147 |
|---------------------------------------------------------------------------------------------------------------------------|-----|

|                                                                                                                                                                                                       |     |
|-------------------------------------------------------------------------------------------------------------------------------------------------------------------------------------------------------|-----|
| <i>Christiane Fellbaum, Ekkehard Felder</i><br>Faktizitätsherstellung im Spiegel sprachlicher Ordnung.<br>Idiomatische Perspektiven-Setzungen im englischen und deutschen<br>Sterbehilfediskurs ..... | 173 |
|-------------------------------------------------------------------------------------------------------------------------------------------------------------------------------------------------------|-----|

## **DISKURSANALYSEN AUßERHALB DER LINGUISTIK**

|                                                                    |     |
|--------------------------------------------------------------------|-----|
| <i>Reiner Keller</i><br>Wissenssoziologische Diskursforschung..... | 197 |
|--------------------------------------------------------------------|-----|

|                                                                                                              |     |
|--------------------------------------------------------------------------------------------------------------|-----|
| <i>Martin Gessmann</i><br>Vom Ende der Macht des Deklarativen. Michel Foucault nach der<br>Postmoderne ..... | 225 |
|--------------------------------------------------------------------------------------------------------------|-----|

|                                                                                         |     |
|-----------------------------------------------------------------------------------------|-----|
| <i>Peter Wiedemann</i><br>Kommunikation von unsicheren Risiken: Ein Problemaufriss..... | 247 |
|-----------------------------------------------------------------------------------------|-----|

## **ERINNERN UND VERGESSEN: FAKTIZITÄT IM FOKUS SPRACHLICHER DYNAMIKEN DES WISSENS**

|                                                                                                                    |     |
|--------------------------------------------------------------------------------------------------------------------|-----|
| <i>Ludwig Jäger</i><br>Erinnern und Vergessen. Zwei transkriptive Verfahren des kulturellen<br>Gedächtnisses ..... | 265 |
|--------------------------------------------------------------------------------------------------------------------|-----|

|                                                                                          |     |
|------------------------------------------------------------------------------------------|-----|
| <i>Matthias Attig</i><br>Spuren des Erinnerns und Vergessens in funktionalen Texten..... | 287 |
|------------------------------------------------------------------------------------------|-----|

|                                                                                                                                                      |     |
|------------------------------------------------------------------------------------------------------------------------------------------------------|-----|
| <i>Thorsten Eitz, Martin Wengeler</i><br>Vergessene Diskurse? Zur Diskursgeschichte der Weimarer Republik am<br>Beispiel des Themas Wirtschaft ..... | 309 |
|------------------------------------------------------------------------------------------------------------------------------------------------------|-----|

|                                                                                                                                                                                                                                   |     |
|-----------------------------------------------------------------------------------------------------------------------------------------------------------------------------------------------------------------------------------|-----|
| <i>Alexander Ziem, Ronny Scholz, David Römer</i><br>Korpuslinguistische Zugänge zum öffentlichen Sprachgebrauch:<br>spezifisches Vokabular, semantische Konstruktionen und<br>syntaktische Muster in Diskursen über „Krisen“..... | 329 |
|-----------------------------------------------------------------------------------------------------------------------------------------------------------------------------------------------------------------------------------|-----|

|                                                                                                                                                                                                       |     |
|-------------------------------------------------------------------------------------------------------------------------------------------------------------------------------------------------------|-----|
| <i>Bettina Radeiski</i><br>Erinnerungen an die DDR oder Erinnerungen an DDR-Propaganda?<br>Exemplarische Überlegungen zur strukturellen Ähnlichkeit von<br>Erinnerungs- und Propagandadiskursen ..... | 359 |
|-------------------------------------------------------------------------------------------------------------------------------------------------------------------------------------------------------|-----|

|                     |     |
|---------------------|-----|
| Autorenangaben..... | 377 |
|---------------------|-----|

|               |     |
|---------------|-----|
| Register..... | 385 |
|---------------|-----|
